# Supplementary material for: Immunoregulation and Clinical Implications of ANGPT2/TIE2+ M-MDSC Signature in Non–Small Cell Lung Cancer
Source: Oxford University Press journal article supplement (doi:10.1158/2326-6066.cir-19-0326), 2019-12-23
Supplement: 23266066cir190326-sup-221707_3_supp_5912848_q19xd4.docx [file 23266066cir190326-sup-221707_3_supp_5912848_q19xd4.docx]

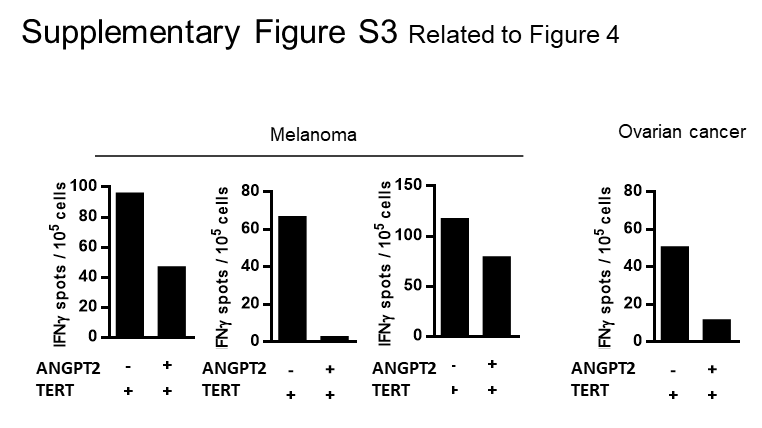


**Supplementary Figure S3: ANGPT2 inhibitory effect against TERT-specific T cell responses.** Anti-TERT T cell responses in presence or not of ANGPT2 in melanoma and ovarian cancer patients. Histograms represent number of TERT specific IFN-γ+ spots from triplicates.
