# Supplementary material for: Immunoregulation and Clinical Implications of ANGPT2/TIE2+ M-MDSC Signature in Non–Small Cell Lung Cancer
Source: Oxford University Press journal article supplement (doi:10.1158/2326-6066.cir-19-0326), 2019-12-23
Supplement: 23266066cir190326-sup-221707_3_supp_5912865_q2q48h.docx [file 23266066cir190326-sup-221707_3_supp_5912865_q2q48h.docx]

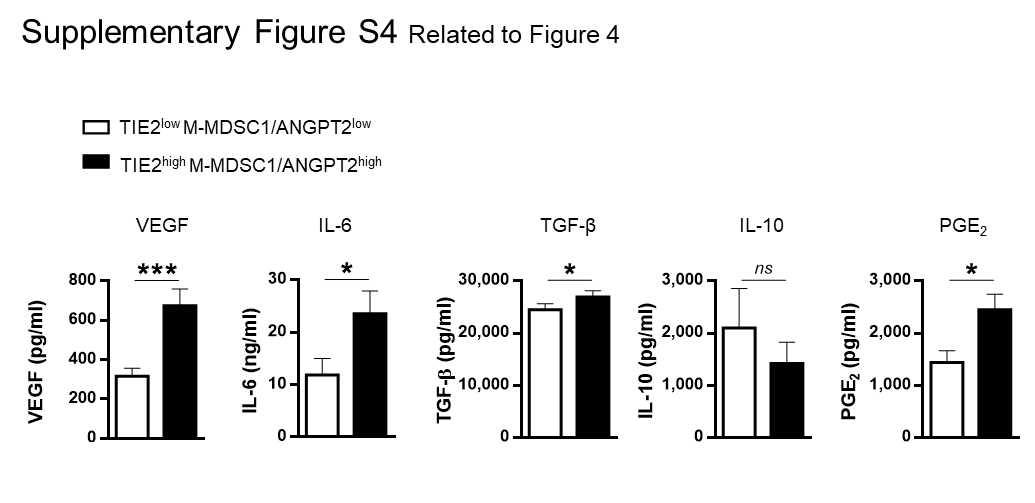


**Supplementary Figure S4: Blood cytokines according to the concentration of ANGPT2 and percentages of TIE2+ M-MDSCs.** Concentrations of proangiogenic (VEGF-A), pro inflammatory (IL-6, PGE2) and immune suppressive (IL-10, TGF-β), cytokines measured by CBA in the sera of NSCLC patients exhibiting TIE2low M-MDSC1/ANGPT2low versus TIE2high M-MDSC1/ANGPT2high signature in blood (Mann&Whitney).
