# Supplementary figures and images for: Immunoregulation and Clinical Implications of ANGPT2/TIE2+ M-MDSC Signature in Non–Small Cell Lung Cancer
Source: Oxford University Press journal article supplement (doi:10.1158/2326-6066.cir-19-0326), 2019-12-23

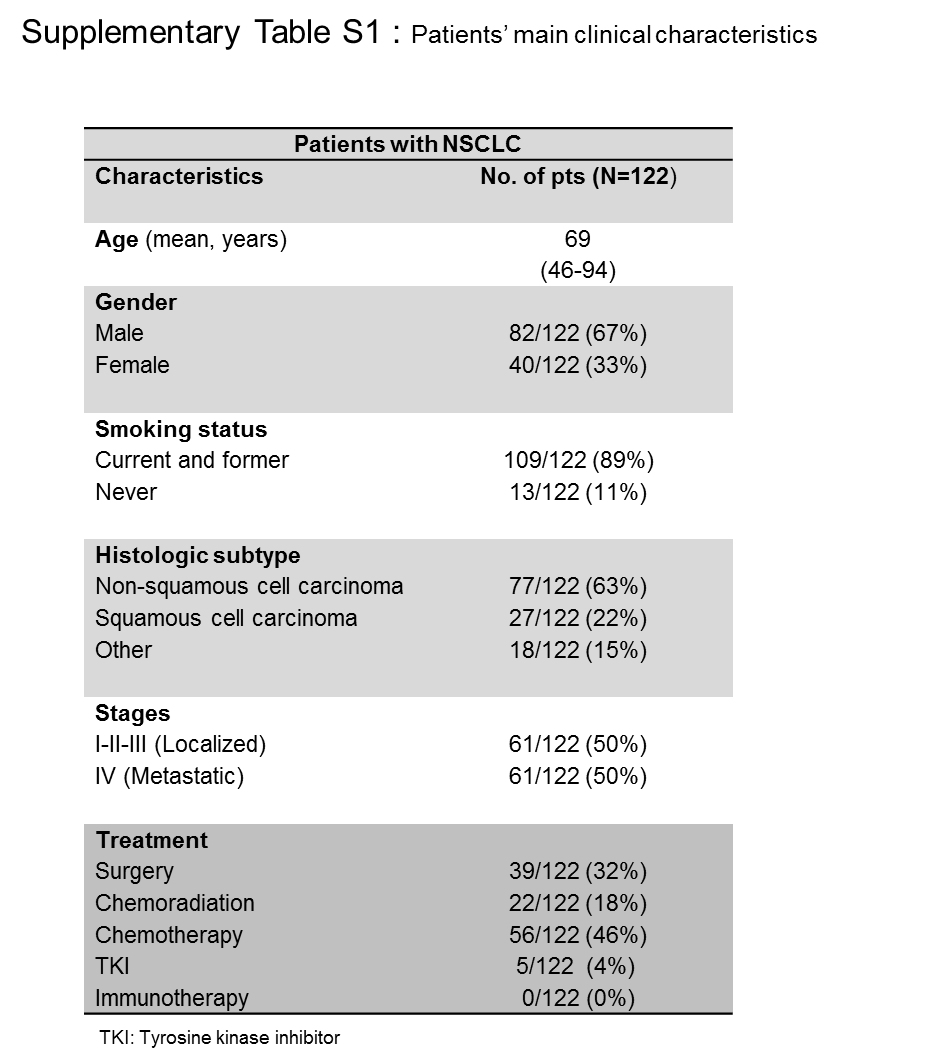

Supplement: 23266066cir190326-sup-221707_3_supp_5912849_q19xd4.docx [file 23266066cir190326-sup-221707_3_supp_5912849_q19xd4.docx]
